# Supplementary material for: Electrochemically activated Co-Prussian blue analogue derived amorphous CoB nanostructures: an efficient electrocatalyst for the oxygen evolution reaction
Source: Royal Society of Chemistry journal article supplement (doi:10.1039/d1dt03947d), 2022-01-01
Supplement: d1dt03947d1.pdf [file d1dt03947d1.pdf]

## Supporting information

### **Electrochemically activated Co-Prussian blue analogue derived amorphous CoB nanostructures: Efficient electrocatalyst for oxygen evolution reaction**

Rajat K. Tripathy,<sup>a, b, c</sup> Aneeya K. Samantara<sup>a, b, c</sup> and J. N Behera<sup>a, b, c\*</sup>

<sup>a</sup> School of Chemical Sciences, National Institute of Science Education and Research (NISER), P. O. Jatni, Khurda 752050, Odisha, India.

<sup>b</sup> Homi Bhabha National Institute (HBNI), Mumbai, India.

<sup>c</sup> Centre for Interdisciplinary Sciences (CIS), NISER, Jatni, Odisha, India 752050.

E-mail: [jnbehera@niser.ac.in](mailto:jnbehera@niser.ac.in)

### Composition and structure of Co-PBA:

The Cobalt Prussian blue analogue (Co PBA,  $\text{Co}_3[\text{Co}(\text{CN})_6]_2 \cdot x\text{H}_2\text{O}$ ) belongs to face centred cubic phase with space group  $Fm\bar{3}m$  contains  $\text{Co}^{+2}$  and  $\text{Co}^{+3}$  ion. Cyanide groups are connected to both type of cobalt ion in different fashion mode. The outer  $\text{Co}^{+2}$  ion attached to six nitrogen atom of cyanide ligand whereas inner  $\text{Co}^{+3}$  ion coordinated to six carbon atom of cyanide ligand forming a framework with large voids. These voids are occupied by water molecules in different modes s.a present in interstitial site or coordinated to deficiency bonded metal ions or water which is hydrogen bonded coordinated to water molecule.<sup>1,2</sup>

### Electrochemical calculations:

The intrinsic electrocatalytic activity of all the electrocatalysts were determined by  $iR$  compensating the recorded polarization plots as per the following equation,

$$E_{iR \text{ corrected}} = E_{\text{observed}} - iR \dots\dots\dots (1)$$

Here,  $I$  and  $R$  are the observed anodic current and solution resistance ( $R_s$ ) of the electrocatalyst. The  $R_s$  was obtained from the Nyquist impedance spectrum recorded in the frequency range of 1 MHz to 0.1 Hz at an applied amplitude of 5 mV.

After calculation of the electrochemical active surface area, the roughness factor was calculated by normalizing the ECSA with the geometrical surface area of the glassy carbon electrode. The turnover frequency (TOF) of the CoB@300, CoB@450, CoB@550 and CoB@650 was calculated by assuming the participation of all the metal atoms in the electrocatalysis process as per the following equation,<sup>3,4</sup>

$$TOF = \frac{J \times S}{4Fn} \dots\dots\dots (2)$$

Here,  $J$ ,  $S$ ,  $F$  and  $n$  are the observed OER current density, geometrical surface area of the glassy carbon electrode, Faraday constant (96485.3 C/mol) and moles of catalytically active sites respectively. The value of “ $n$ ” was calculated by dividing the mass of the electrocatalyst casted on the electrode surface by molecular mass. Since one molecule of oxygen evolved along with four number of electrons, so the term 4 is taken in the denominator.

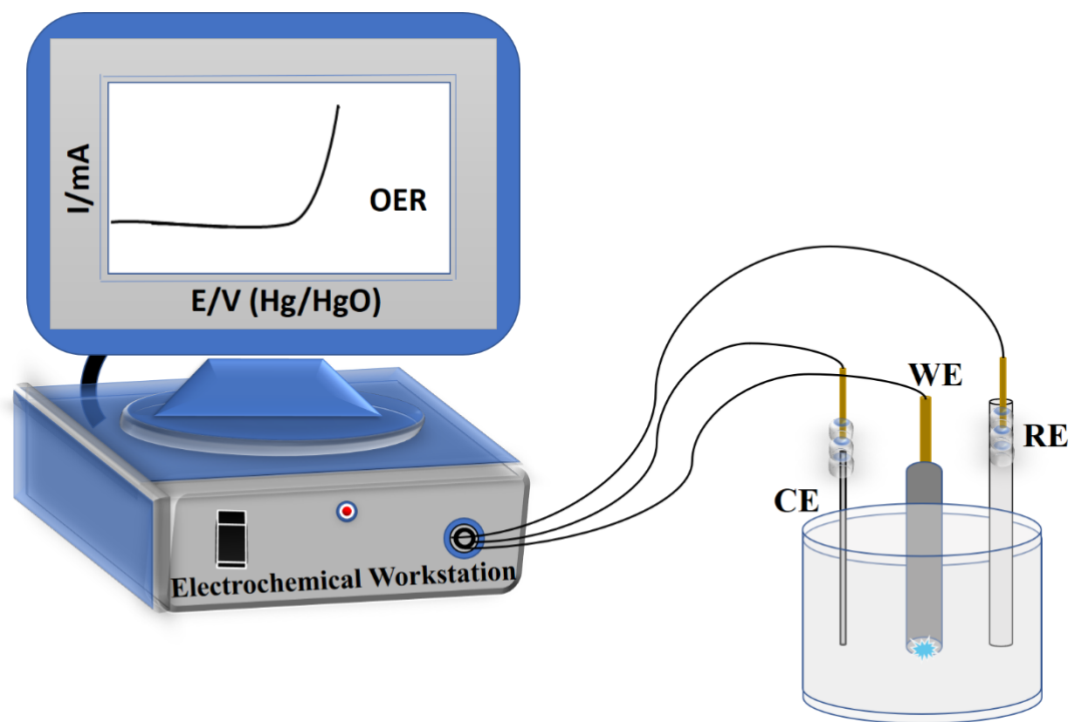

**Fig. S 1** Schematic presentation of three electrode electrochemical cell

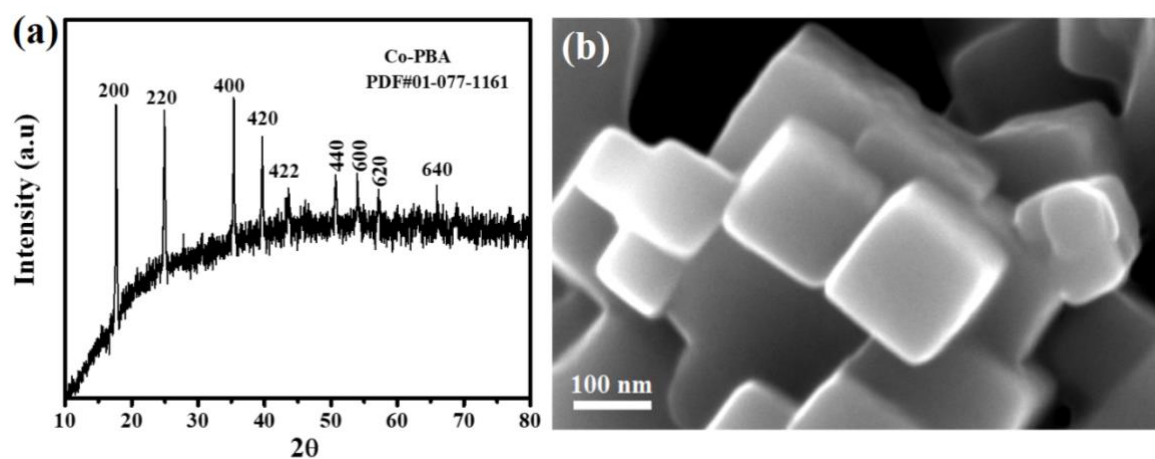

**Fig. S 2** (a) X-ray diffraction pattern and (b) FESEM for the Co-PBA.

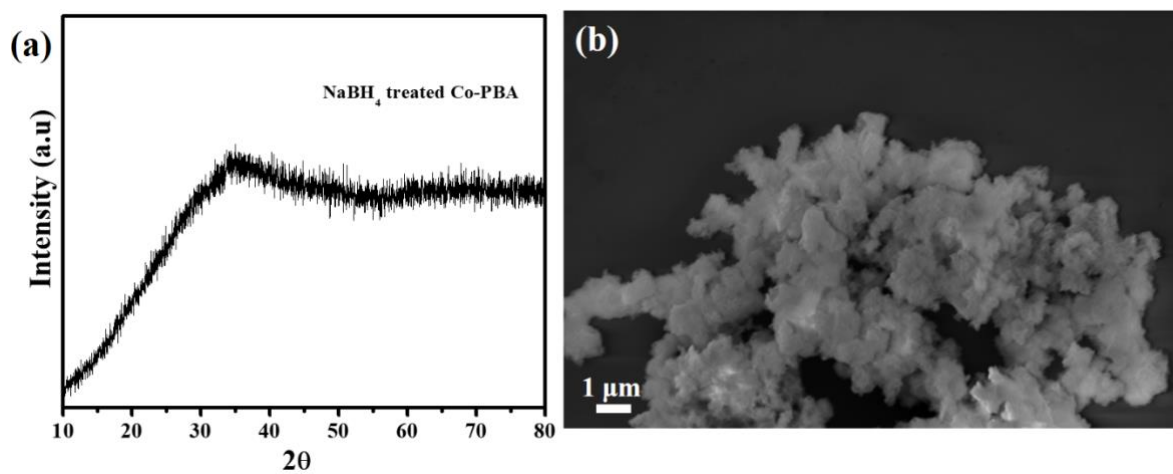

**Fig. S 3** (a) X-ray diffraction pattern and (b) FESEM image of Co-PBA after treating with NaBH<sub>4</sub>.

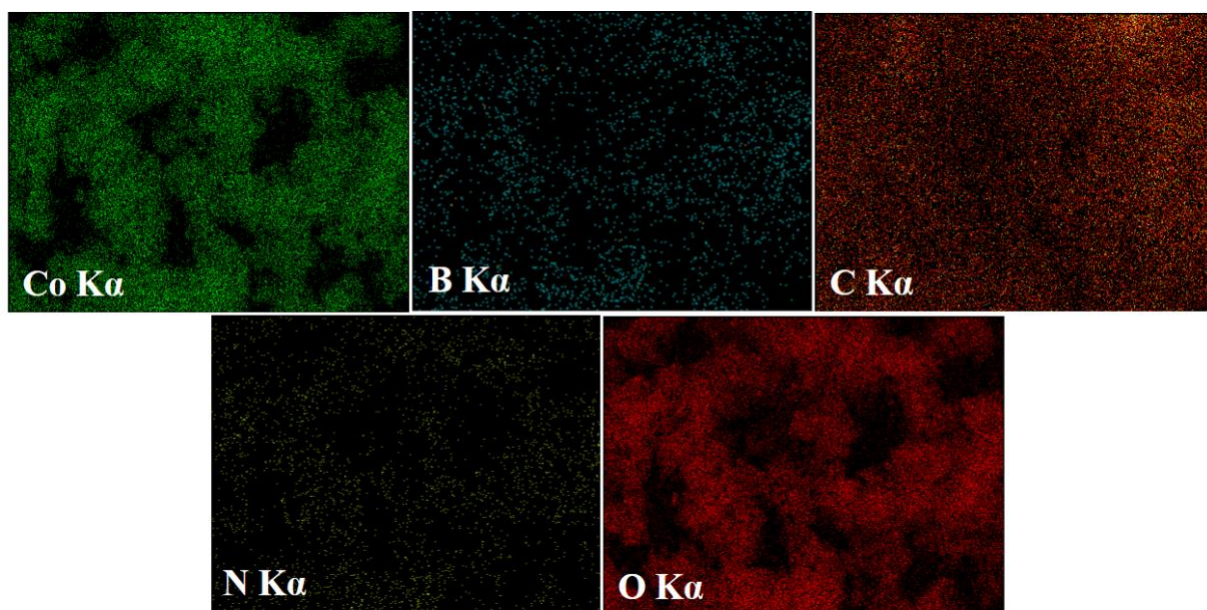

**Fig. S 4** Elemental mapping for CoB@300.

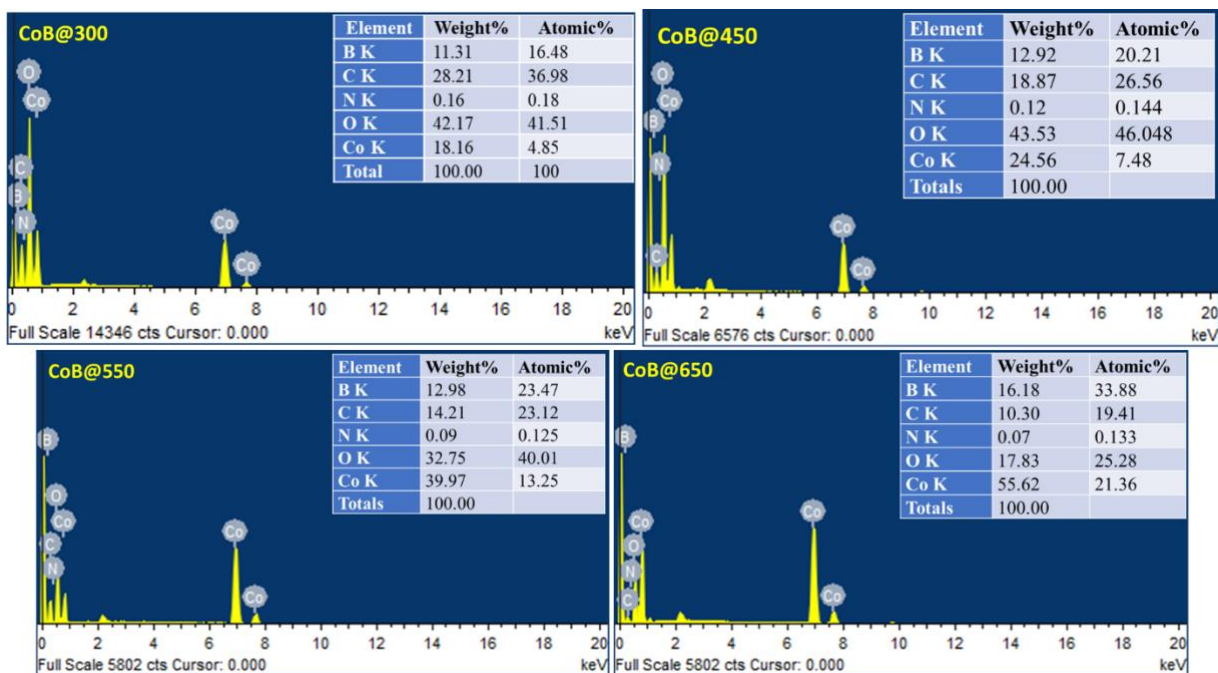

**Fig. S 5** The EDS showing the presence of different elements in CoB annealed at different temperatures and the inset shows the corresponding weight and atomic percentage of elements.

| Sample name | Carbon | Hydrogen | Nitrogen |
|-------------|--------|----------|----------|
| CoB@300     | 1.312  | 2.102    | 0.28     |
| CoB@450     | 1.116  | 1.905    | 0.051    |
| CoB@550     | 0.738  | 0.639    | 0.064    |
| CoB@650     | 0.604  | 0.608    | 0.048    |

**Table S 1** CHN analysis report of CoB@300, CoB@450, CoB@550 and CoB@650.

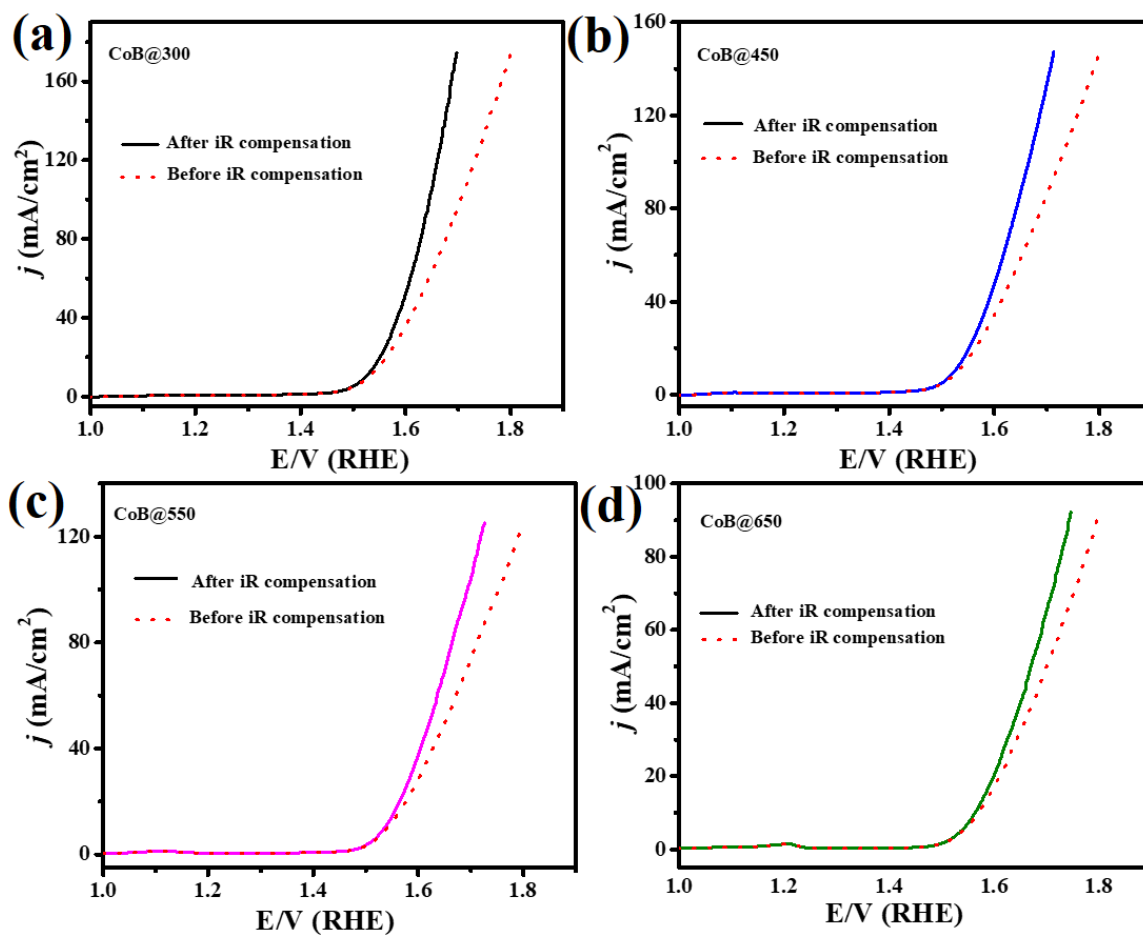

**Fig. S 6** Linear sweep voltammograms for the (a) CoB@300, (b) CoB@450, (c) CoB@550 and (d) CoB@650 before and after  $iR$ -compensation.

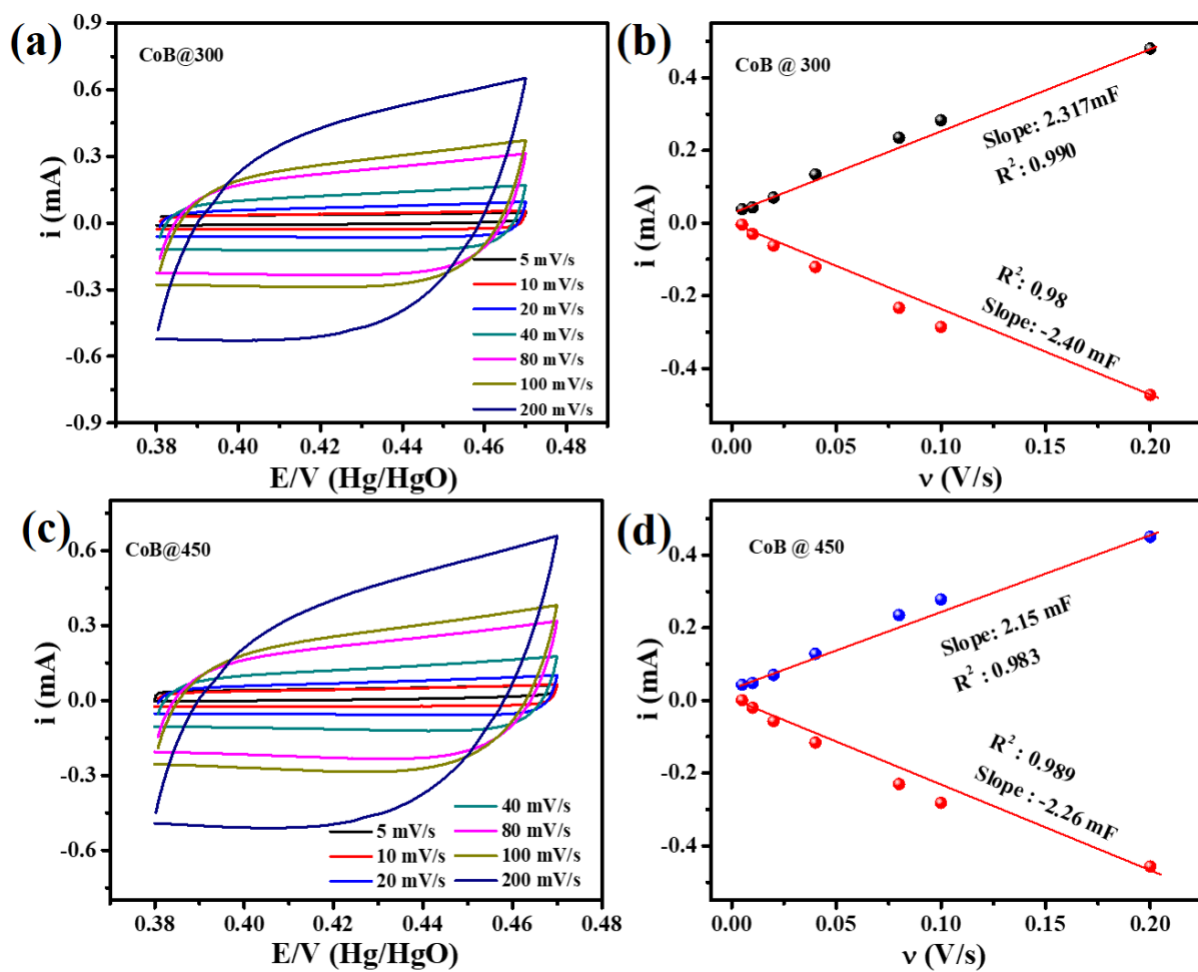

**Fig. S 7** (a, c) Cyclic voltammograms and (b, d) plot of current at different sweep rate for CoB@300 and CoB@450.



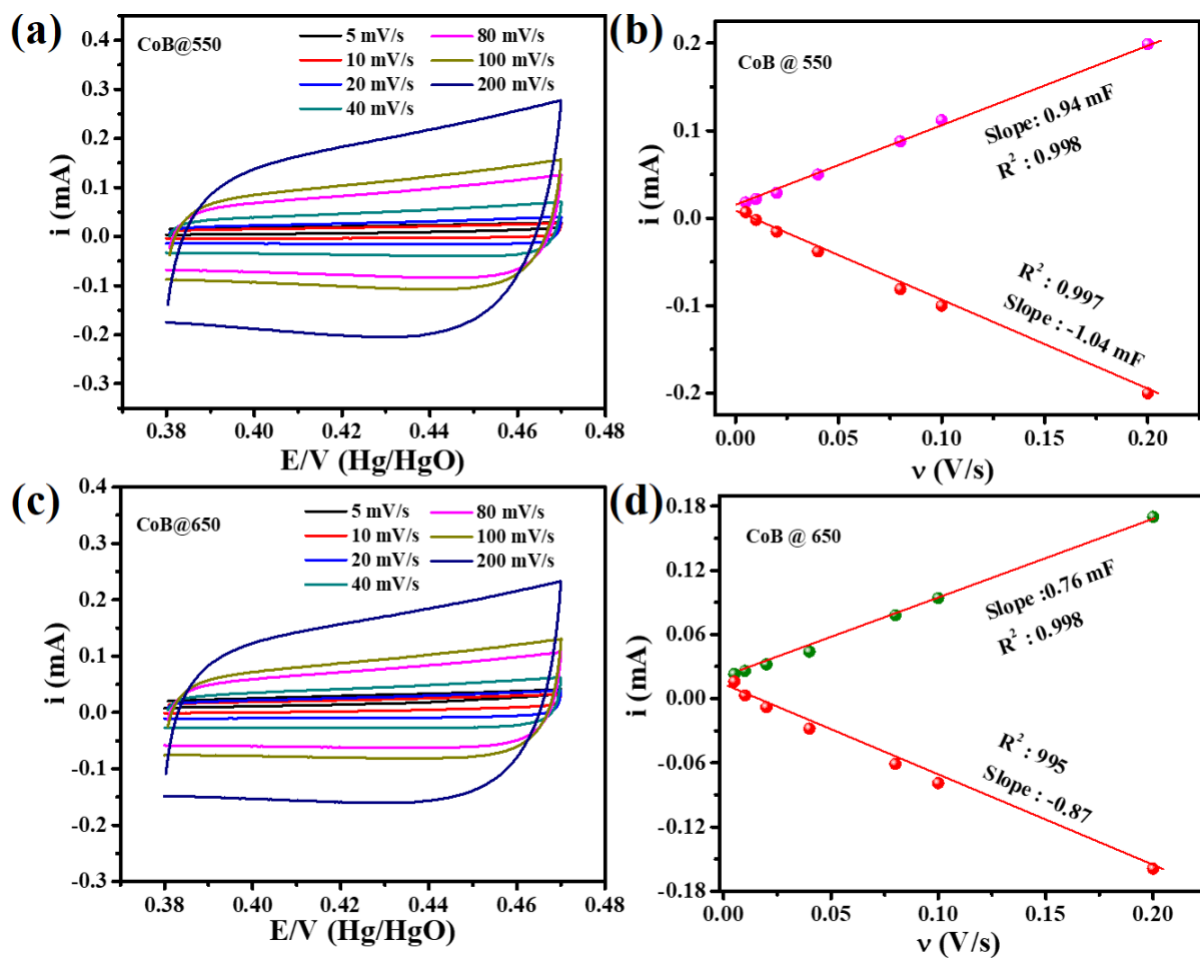

**Fig. S 8** (a, c) Cyclic voltammograms and (b, d) plot of current at different sweep rate for CoB@550 and CoB@650.

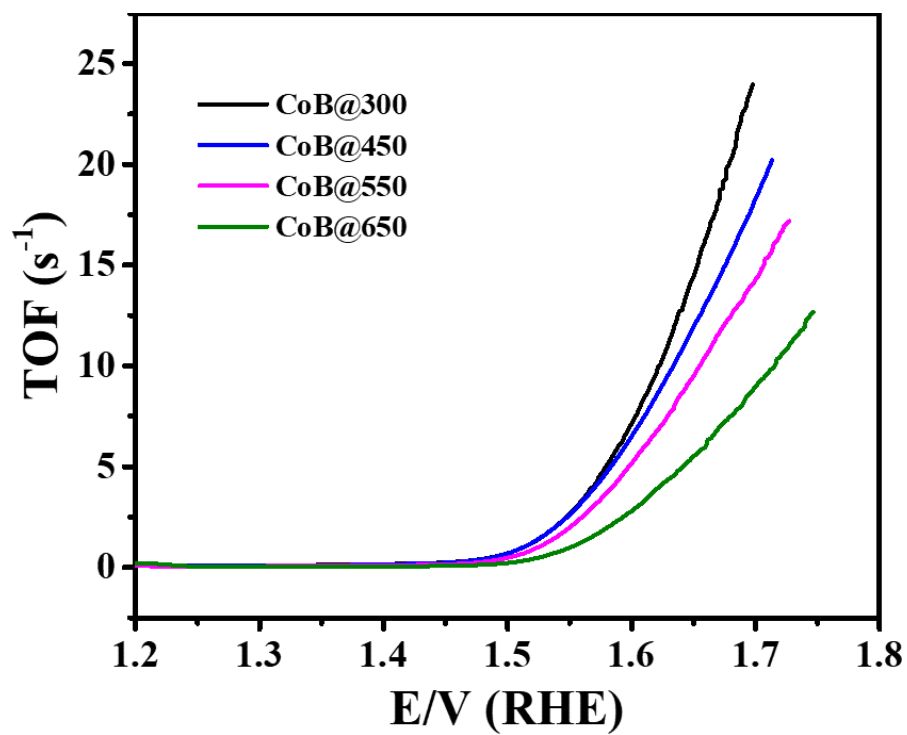

**Fig. S 9** Plot showing the turnover frequency for CoB@300, CoB@450, CoB@550 and CoB@650.

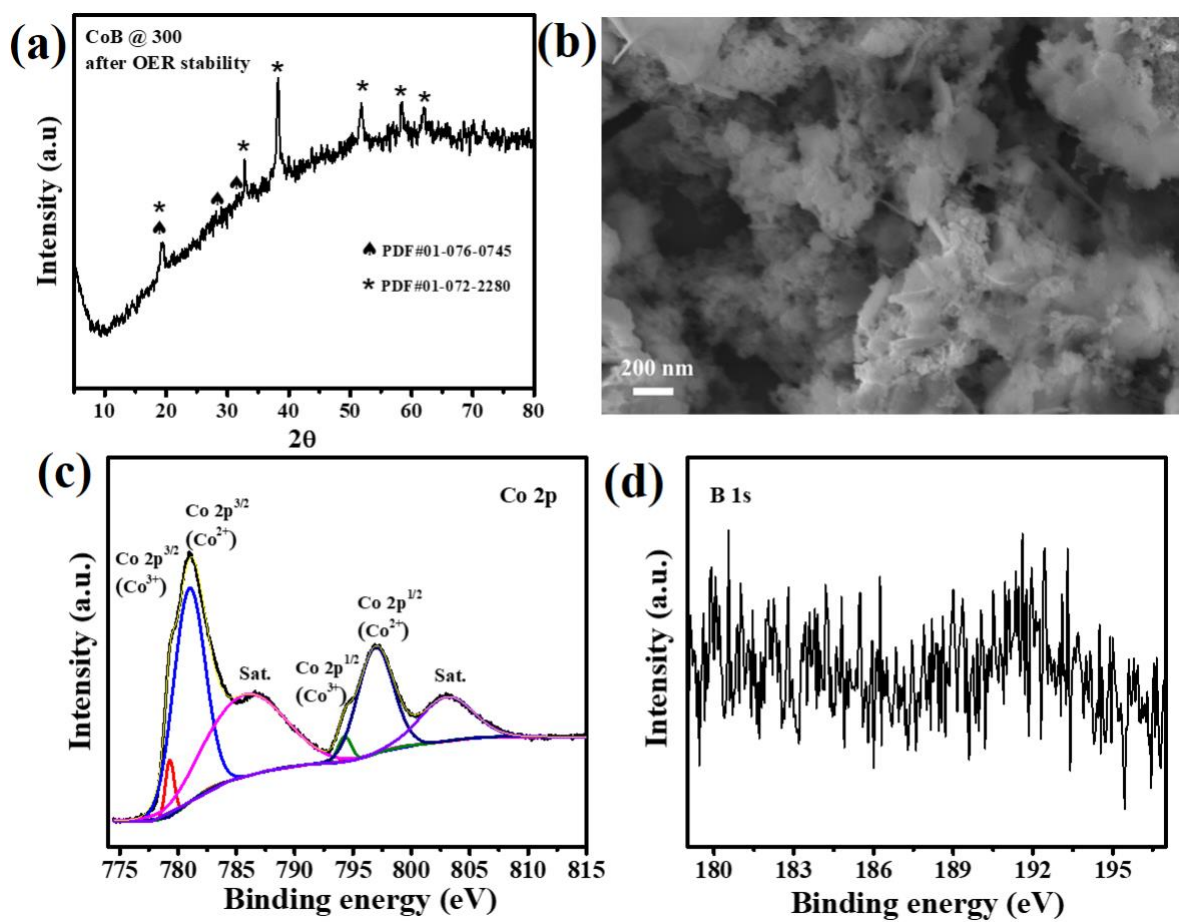

**Fig. S 10** (a) X-ray diffraction pattern, (b) FESEM, high-resolution X-ray photoelectron spectrum for (c) Co 2p and (d) B 1s of CoB@300 after 15 hours of electrolysis.

**Table S 2** Table showing the comparison of the electrocatalytic activity of CoB with the reported literatures.

| Catalysts                            | Electrolyte (Conc.) | Overpotential (mV) @10 mA/cm <sup>-2</sup> | Tafel Slope (mV/dec) | References          |
|--------------------------------------|---------------------|--------------------------------------------|----------------------|---------------------|
| Ni-Co-B                              | 1M KOH              | 300                                        | 113                  | 5                   |
| Ni <sub>x</sub> B-300                | 1M KOH              | 380                                        | 89                   | 6                   |
| Ni-B @ Ni(OH) <sub>2</sub> @ Ni foam | 1M KOH              | 300@ 100mA/cm <sup>-2</sup>                | 49.0                 | 7                   |
| Ni-Fe-B/rGO                          | 1M KOH              | 265                                        | 58                   | 8                   |
| Ni <sub>x</sub> B/f-MWCNT            | 1M KOH              | 286                                        | 46.3                 | 9                   |
| Co-B/C                               | 1M KOH              | 320                                        | 75.00                | 10                  |
| Co-B/NF                              | 1M KOH              | 315                                        | 56.00                | 7 <sup>11</sup>     |
| Co-3Mo-B                             | 1M NaOH             | 320                                        | 155.0                | 12                  |
| Fe <sub>2</sub> B                    | 1M KOH              | 296                                        | 52.4                 | 13                  |
| Fe <sub>x</sub> B                    | 1M KOH              | 260                                        | 57.9                 | 14                  |
| Ni-B <sub>i</sub> @NB                | 1M KOH              | 302                                        | 52.0                 | 15                  |
| Ni-B-O @ Ni <sub>3</sub> B           | 1M KOH              | 264                                        | 127.0                | 16                  |
| NiB                                  | 1 M KOH             | 240                                        | 58                   | 17                  |
| Ni <sub>3</sub> B                    | 1 M KOH             | 300                                        | 43                   | 18                  |
| CNBO-NSs                             | 1 M KOH             | 300                                        | 60                   | 19                  |
| Co-Ni-B @NF                          | alkaline            | 313                                        | 120                  | 20                  |
| CoFe-B                               | 1M KOH              | 261                                        | 61                   | 21                  |
| <b>CoB@300</b>                       | <b>1M KOH</b>       | <b>290</b>                                 | <b>62</b>            | <b>Present work</b> |

**Table S 3** Table showing the OER activity of different catalysts.

| Sample | $\eta@10$<br>mA/cm <sup>2</sup><br>(mV) | $\eta@50$<br>mA/cm <sup>2</sup><br>(mV) | Tafel<br>slope<br>(mV/dec.) | ECSA<br>(cm <sup>2</sup> ) | Roughness<br>factor (R <sub>f</sub> ) | TOF (s <sup>-1</sup> )<br>@ $\eta=400$ mV |
|--------|-----------------------------------------|-----------------------------------------|-----------------------------|----------------------------|---------------------------------------|-------------------------------------------|
| Co@300 | 290                                     | 360                                     | 62                          | 63.75                      | 910.7                                 | 11.25                                     |
| Co@450 | 295                                     | 375                                     | 76                          | 55.10                      | 787.1                                 | 9.78                                      |
| Co@550 | 300                                     | 392                                     | 78                          | 24.75                      | 353.5                                 | 7.70                                      |
| Co@650 | 355                                     | 441                                     | 82                          | 20.37                      | 291.0                                 | 4.39                                      |

**References:**

- 1 F. Herren, A. Ludi, P. Fischer and W. Halg, *Inorg. Chem.*, 1980, **19**, 956–959.
- 2 B. Bal, S. Ganguli and M. Bhattacharya, *J. Phys. Chem.*, 1984, **88**, 4575–4577.
- 3 R. K. Tripathy, A. K. Samantara and J. N. Behera, *Dalton Trans.*, 2019, **48**, 10557–10564.
- 4 L. Trotochaud, J. K. Ranney, K. N. Williams and S. W. Boettcher, *J. Am. Chem. Soc.*, 2012, **134**, 17253–17261.
- 5 S. Wang, P. He, Z. Xie, L. Jia, M. He, X. Zhang, F. Dong, H. Liu, Y. Zhang and C. Li, *Electrochim. Acta*, 2019, **296**, 644–652.
- 6 J. Masa, I. Sinev, H. Mistry, E. Ventosa, M. de la Mata, J. Arbiol, M. Muhler, B. Roldan Cuenya and W. Schuhmann, *Adv. Energy Mater.*, 2017, **7**, 1700381.
- 7 X. Liang, R. Dong, D. Li, X. Bu, F. Li, L. Shu, R. Wei and J. C. Ho, *Chem Cat Chem*, 2018, **10**, 4555–4561.
- 8 L. An, Y. Sun, Y. Zong, Q. Liu, J. Guo and X. Zhang, *J. Solid State Chem.*, 2018, **265**, 135–139.
- 9 X. Chen, Z. Yu, L. Wei, Z. Zhou, S. Zhai, J. Chen, Y. Wang, Q. Huang, H. E. Karahan, X. Liao and Y. Chen, *J. Mater. Chem. A*, 2019, **7**, 764–774.
- 10 Y. Li, H. Xu, H. Huang, L. Gao, Y. Zhao and T. Ma, *Electrochem. commun.*, 2018, **86**, 140–144.
- 11 Z. Chen, Q. Kang, G. Cao, N. Xu, H. Dai and P. Wang, *Int. J. Hydrogen Energy*, 2018, **43**, 6076–6087.
- 12 S. Gupta, N. Patel, R. Fernandes, S. Hanchate, A. Miotello and D. C. Kothari, *Electrochim. Acta*, 2017, **232**, 64–71.
- 13 H. Li, P. Wen, Q. Li, C. Dun, J. Xing, C. Lu, S. Adhikari, L. Jiang, D. L. Carroll and

- S. M. Geyer, *Adv. Energy Mater.*, 2017, **7**, 1700513.
- 14 L. Wang, J. Li, X. Zhao, W. Hao, X. Ma, S. Li and Y. Guo, *Adv. Mater. Interfaces*, 2019, **6**, 1801690.
- 15 W. J. Jiang, S. Niu, T. Tang, Q. H. Zhang, X. Z. Liu, Y. Zhang, Y. Y. Chen, J. H. Li, L. Gu, L. J. Wan and J. S. Hu, *Angew. Chemie - Int. Ed.*, 2017, **56**, 6572–6577.
- 16 W. Yuan, X. Zhao, W. Hao, J. Li, L. Wang, X. Ma and Y. Guo, *Chem Electro Chem*, 2019, **6**, 764–770.
- 17 R. K. Tripathy, A. K. Samantara and J. N. Behera, *Sustain. Energy Fuels*, 2021, **5**, 1184–1193.
- 18 J. Li, H. Chen, Y. Liu, R. Gao and X. Zou, *J. Mater. Chem. A*, 2019, **7**, 5288–5294.
- 19 T. He, J. M. V. Nsanzimana, R. Qi, J. Y. Zhang, M. Miao, Y. Yan, K. Qi, H. Liu and B. Y. Xia, *J. Mater. Chem. A*, 2018, **6**, 23289–23294.
- 20 N. Xu, G. Cao, Z. Chen, Q. Kang, H. Dai and P. Wang, *J. Mater. Chem. A*, 2017, **5**, 12379–12384.
- 21 Y. X. Yang, B. L. Li, Q. Zhang, W. H. Guo, X. H. Wang, L. J. Li, H. Q. Luo and N. B. Li, *Energy Technol.*, 2021, **9**, 2000178.
